# Supplementary material for: Evaluation of the efficiency of brackish desalination ion exchange membranes using electrodialysis process
Source: Royal Society of Chemistry journal article supplement (doi:10.1039/c5ra10616h), 2015-01-01
Supplement: c5ra10616h1.pdf [file c5ra10616h1.pdf]

**Supporting information**

**Evaluation of efficiency of brackish desalination ion exchange membranes using  
electrodialysis process**

**Krishnaveni Venugopal and Sangeetha Dharmalingam\***

Department of Mechanical Engineering, Anna University, Guindy

Chennai 600025, Tamil Nadu, India

Tel: +91 044 22357763, Fax: +91 044 22357744.

**\*Corresponding Author: [sangeetha@annauniv.edu](mailto:sangeetha@annauniv.edu)**

**S1: Ionic Conductivity Studies**

The ionic conductivity  $\sigma$  (S/cm) of the membrane was determined using impedance spectroscopy. Membranes with required dimensions were cut and pre-treated with 0.01 N sulphuric acid and kept in water for 100 % hydration. From the difference between the resistance of the blank cell and the one with a membrane separating the working and counter electrode compartments, the resistance of the membrane was calculated and converted to conductivity values using the given formula,

$$\text{Conductivity } (\sigma) \text{ (S / cm)} = \frac{L}{(R \times A)}$$

Where  $\sigma$  is the conductivity in S/cm, R is the resistance offered by the membrane in ohms, L is the thickness of the membrane in cm and A is the area of the membrane in cm<sup>2</sup>.
